# Supplementary material
Source: PubMed Central journal article supplement (PMC4408283)
Supplement: supp_WNL.0000000000001462_Tables.pdf [file supp_WNL.0000000000001462_Tables.pdf]

**Table e-1 Demographic and clinical characteristics at entry to FREEDOMS (extension ITT population subgroup of 48-month completers)**

|                                                           | Placebo to fingolimod switch groups       |                                                            | Continuous fingolimod treatment groups       |                                                               |
|-----------------------------------------------------------|-------------------------------------------|------------------------------------------------------------|----------------------------------------------|---------------------------------------------------------------|
|                                                           | Placebo–<br>fingolimod 0.5 mg<br>(n = 68) | Placebo–<br>fingolimod<br>1.25 mg <sup>a</sup><br>(n = 59) | Continuous<br>fingolimod 0.5 mg<br>(n = 155) | Continuous<br>fingolimod<br>1.25 mg <sup>a</sup><br>(n = 126) |
| <b>Age, years</b>                                         | 38.7 (8.4)                                | 35.0 (9.7)                                                 | 36.2 (9.1)                                   | 37.2 (8.8)                                                    |
| <b>Female, n (%)</b>                                      | 46 (67.6)                                 | 46 (78.0)                                                  | 101 (65.2)                                   | 92 (73.0)                                                     |
| <b>Time from first MS symptom to randomization, years</b> | 7.5 (5.7)                                 | 7.7 (6.6)                                                  | 7.8 (6.6)                                    | 7.7 (5.7)                                                     |
| <b>Number of relapses in 1 year before enrollment</b>     | 1.4 (0.6)                                 | 1.5 (1.0)                                                  | 1.5 (0.8)                                    | 1.5 (0.9)                                                     |

|                                                        |             |             |             |             |
|--------------------------------------------------------|-------------|-------------|-------------|-------------|
| <b>Number of relapses in 2 years before enrollment</b> | 2.0 (1.0)   | 2.3 (1.4)   | 2.2 (1.3)   | 2.2 (1.3)   |
| <b>EDSS score</b>                                      | 2.5 (1.3)   | 2.5 (1.3)   | 2.4 (1.2)   | 2.3 (1.3)   |
| <b>Number of Gd-enhancing T1 lesions per patient</b>   | 1.1 (2.7)   | 1.1 (2.0)   | 1.3 (3.4)   | 1.4 (3.1)   |
| <b>Volume of T2 lesions, mm<sup>3</sup></b>            | 5796 (7157) | 5460 (6197) | 6263 (6769) | 7174 (8445) |
| <b>Normalized brain volume, mL</b>                     | 1513 (82.9) | 1520 (88.6) | 1520 (80.5) | 1511 (93.3) |

---

<sup>a</sup>All patients receiving fingolimod 1.25 mg/day were switched to fingolimod 0.5 mg/day after the 1.25 mg/day dose was discontinued from all MS clinical studies. Values are mean (standard deviation) unless otherwise stated.

Abbreviations: EDSS = Expanded Disability Status Scale. Gd = gadolinium. ITT = intent-to-treat. MS = multiple sclerosis.

**Table e-2 Within-group comparisons (extension phase vs FREEDOMS) of ARR and MRI outcomes during months 0–24 and months 24–48 (extension ITT population)**

|                                           | <b>Placebo–fingolimod<br/>0.5 mg<br/>(n = 154)</b> | <b>Placebo–fingolimod<br/>1.25 mg<sup>a</sup><br/>(n = 145)</b> | <b>Continuous<br/>fingolimod 0.5 mg<br/>(n = 330)</b> | <b>Continuous<br/>fingolimod 1.25 mg<sup>a</sup><br/>(n = 287)</b> |
|-------------------------------------------|----------------------------------------------------|-----------------------------------------------------------------|-------------------------------------------------------|--------------------------------------------------------------------|
| <b>ARR</b>                                |                                                    |                                                                 |                                                       |                                                                    |
| Months 0–24                               | 0.42                                               | 0.37                                                            | 0.21                                                  | 0.12                                                               |
| Months 24–48                              | 0.19                                               | 0.21                                                            | 0.18                                                  | 0.13                                                               |
| <b>ARR estimate (95% CI)</b>              |                                                    |                                                                 |                                                       |                                                                    |
| Months 0–24                               | 0.42 (0.34–0.51)                                   | 0.36 (0.30–0.45)                                                | 0.20 (0.16–0.24)                                      | 0.12 (0.09–0.16)                                                   |
| Months 24–48                              | 0.19 (0.13–0.26)                                   | 0.20 (0.15–0.27)                                                | 0.17 (0.13–0.22)                                      | 0.14 (0.10–0.18)                                                   |
| ARR ratio, month 24-48 vs month 0–24      | 0.45 (0.32–0.62)                                   | 0.55 (0.40–0.76)                                                | 0.85 (0.68–1.06)                                      | 1.14 (0.81–1.59)                                                   |
| <b>24</b>                                 |                                                    |                                                                 |                                                       |                                                                    |
| <i>p</i> value, month 24-48 vs month 0–24 | <0.0001                                            | 0.0003                                                          | 0.1511                                                | 0.4487                                                             |
| NNT                                       | 4.33                                               | 6.10                                                            | 33.33                                                 | 58.82                                                              |

|                         |      |      |      |       |
|-------------------------|------|------|------|-------|
| Absolute risk reduction | 0.23 | 0.16 | 0.03 | -0.02 |
|-------------------------|------|------|------|-------|

### Number of Gd-enhancing T1 lesions

|                                             |    |    |     |     |
|---------------------------------------------|----|----|-----|-----|
| Patients with evaluable MRI, <sup>b</sup> n | 67 | 61 | 162 | 127 |
|---------------------------------------------|----|----|-----|-----|

#### Month 24

|               |                  |                  |                  |                  |
|---------------|------------------|------------------|------------------|------------------|
| Mean (95% CI) | 1.19 (0.96–1.49) | 1.28 (1.02–1.60) | 0.11 (0.07–0.18) | 0.22 (0.15–0.32) |
|---------------|------------------|------------------|------------------|------------------|

|              |            |            |            |            |
|--------------|------------|------------|------------|------------|
| Median (IQR) | 0 (0 to 1) | 0 (0 to 2) | 0 (0 to 0) | 0 (0 to 0) |
|--------------|------------|------------|------------|------------|

|       |      |     |     |      |
|-------|------|-----|-----|------|
| Range | 0–17 | 0–9 | 0–5 | 0–11 |
|-------|------|-----|-----|------|

#### Month 48

|               |                  |                  |                  |                  |
|---------------|------------------|------------------|------------------|------------------|
| Mean (95% CI) | 0.07 (0.03–0.18) | 0.11 (0.05–0.24) | 0.30 (0.22–0.39) | 0.23 (0.16–0.33) |
|---------------|------------------|------------------|------------------|------------------|

|              |            |            |            |            |
|--------------|------------|------------|------------|------------|
| Median (IQR) | 0 (0 to 0) |
|--------------|------------|------------|------------|------------|

|       |     |     |      |     |
|-------|-----|-----|------|-----|
| Range | 0–2 | 0–2 | 0–10 | 0–6 |
|-------|-----|-----|------|-----|

|                                           |         |         |        |        |
|-------------------------------------------|---------|---------|--------|--------|
| <i>p</i> value, month 24–48 vs month 0–24 | <0.0001 | <0.0001 | 0.0721 | 0.7326 |
|-------------------------------------------|---------|---------|--------|--------|

### Patients free from Gd-enhancing T1 lesions

|                                             |    |    |     |     |
|---------------------------------------------|----|----|-----|-----|
| Patients with evaluable MRI, <sup>c</sup> n | 75 | 69 | 171 | 137 |
|---------------------------------------------|----|----|-----|-----|

|                                           |           |           |            |            |
|-------------------------------------------|-----------|-----------|------------|------------|
| Months 0–24, n (%)                        | 24 (32.0) | 22 (31.9) | 128 (74.9) | 110 (80.3) |
| Months 24–48, n (%)                       | 60 (80.0) | 54 (78.3) | 136 (79.5) | 106 (77.4) |
| <i>p</i> value, month 24–48 vs month 0–24 | <0.0001   | <0.0001   | 0.2682     | 0.5716     |
| NNT                                       | 2.08      | 2.16      | 21.74      | 34.48      |
| Absolute risk ratio                       | 0.48      | 0.46      | 0.05       | –0.03      |

#### Number of new or newly enlarged T2 lesions

|                                |                  |                     |                  |                  |
|--------------------------------|------------------|---------------------|------------------|------------------|
| Patients with evaluable MRI, n | 69               | 64                  | 163              | 123              |
| Months 0–24                    |                  |                     |                  |                  |
| Mean (95% CI)                  | 8.12 (7.47–8.82) | 12.83 (11.98–13.74) | 2.66 (2.42–2.93) | 2.14 (1.89–2.41) |
| Median (IQR)                   | 4 (1 to 11)      | 7.5 (1 to 16.5)     | 0 (0 to 2)       | 0 (0 to 2)       |
| Range                          | 0–59             | 0–99                | 0–107            | 0–40             |
| Month 48                       |                  |                     |                  |                  |
| Mean (95% CI)                  | 1.43 (1.18–1.75) | 2.34 (2.00–2.75)    | 2.58 (2.34–2.84) | 1.71 (1.49–1.95) |
| Median (IQR)                   | 0 (0 to 2)       | 0 (0 to 2)          | 0 (0 to 1)       | 0 (0 to 2)       |
| Range                          | 0–10             | 0–24                | 0–77             | 0–47             |

|                                             |         |         |        |        |
|---------------------------------------------|---------|---------|--------|--------|
| <i>p</i> value, months 24–48 vs months 0–24 | <0.0001 | <0.0001 | 0.0037 | 0.2491 |
|---------------------------------------------|---------|---------|--------|--------|

### Patients free from new or newly enlarged T2 lesions

|                                             |           |           |            |           |
|---------------------------------------------|-----------|-----------|------------|-----------|
| Patients with evaluable MRI <sup>d</sup>    | 69        | 65        | 163        | 126       |
| Months 0–24, n (%)                          | 16 (23.2) | 12 (18.5) | 82 (50.3)  | 67 (53.2) |
| Months 24–48, n (%)                         | 38 (55.1) | 34 (52.3) | 113 (69.3) | 72 (57.1) |
| <i>p</i> value, months 24–48 vs months 0–24 | <0.0001   | <0.0001   | <0.0001    | 0.5515    |
| NNT                                         | 3.13      | 2.96      | 5.26       | 25.64     |
| Absolute risk reduction                     | 0.32      | 0.34      | 0.19       | 0.04      |

---

ARR estimates based on a Poisson model (with repeated measures where treatment period is the main effect) adjusted for number of relapses in the 2 years before enrollment. Log (time in study) is the offset variable. Within-group comparisons (months 24–48 vs months 0–24) were made with the Wilcoxon signed-rank test. <sup>a</sup>All patients receiving fingolimod 1.25 mg/day were switched to fingolimod 0.5 mg/day after the 1.25 mg/day dose was discontinued from all MS clinical studies. <sup>b</sup>Number of patients with evaluable T1 MRI scans at both month 24 and month 48. <sup>c</sup>Number of patients with evaluable T1 MRI scans. Includes patients not free of Gd-

enhancing T1 lesions at any time point, or free of Gd-enhancing T1 lesions at all time-points, in the specified periods being compared. <sup>d</sup>Number of patients with evaluable T2 MRI scans. Includes patients not free of T2 lesions at any timepoint, or free of T2 lesions at all timepoints, in the specified periods being compared. Abbreviations: ARR = annualized relapse rate. CI = confidence interval. Gd = gadolinium. IQR = interquartile range. ITT = intent-to-treat. MRI = magnetic resonance imaging. NNT = number needed to treat. SD = standard deviation.

**Table e-3 Between-group comparison at month 24 of clinical and MRI outcomes during FREEDOMS, among patients who completed month 48 (FREEDOMS ITT population, subgroup of 48-month completers)**

|                              | Placebo group<br>(switched to<br>fingolimod in<br>the extension)<br>(n = 128) | Continuous<br>fingolimod 0.5 mg<br>(n = 156) | Continuous<br>fingolimod 1.25 mg<br>(n = 127) | <i>p</i> value for<br>fingolimod<br>0.5 mg vs<br>placebo | <i>p</i> value for<br>fingolimod<br>1.25 mg<br>vs<br>placebo |
|------------------------------|-------------------------------------------------------------------------------|----------------------------------------------|-----------------------------------------------|----------------------------------------------------------|--------------------------------------------------------------|
| <b>ARR estimate (95% CI)</b> |                                                                               |                                              |                                               |                                                          |                                                              |
| Month 0–12 <sup>a</sup>      | 0.36 (0.26, 0.50)                                                             | 0.25 (0.18, 0.35)                            | 0.08 (0.04, 0.15)                             | 0.0964                                                   | <0.0001                                                      |
| NNT                          | –                                                                             | 9.26                                         | 3.56                                          |                                                          |                                                              |
| Absolute risk reduction      | –                                                                             | 0.11                                         | 0.28                                          |                                                          |                                                              |
| Month 12–24 <sup>a</sup>     | 0.33 (0.23, 0.45)                                                             | 0.16 (0.11, 0.24)                            | 0.07 (0.04, 0.14)                             | 0.0041                                                   | <0.0001                                                      |
| NNT                          | –                                                                             | 6.21                                         | 3.95                                          |                                                          |                                                              |
| Absolute risk reduction      | –                                                                             | 0.16                                         | 0.25                                          |                                                          |                                                              |

**Change in EDSS score, months 0–**

0.1183

0.2469

**24**

128

155

125

n<sup>b</sup>

0.04 (−0.13–0.20)

−0.06 (−0.20–0.07)

−0.02 (−0.16–0.12)

Mean (95% CI)

0 (−0.5 to 0.5)

0 (−0.5 to 0)

0 (−0.5 to 0)

Median (IQR)

−3.0 to 2.5

−3.0 to 3.0

−2.5 to 4.0

Range

**Number of new or newly enlarged**

&lt;0.0001

&lt;0.0001

**T2 lesion, months 0–24**n<sup>b</sup>

125

156

119

Mean (95% CI)

9.63 (9.10–10.19)

2.67 (2.43–2.95)

1.76 (1.54–2.02)

Median (IQR)

5.0 (1.0 to 14.0)

1.0 (0 to 2.0)

0 (0 to 2.0)

Range

0 to 67

0 to 107

0 to 40

**Percentage change in T2 lesion****volume, months 0– 24**

&lt;0.0001 &lt;0.0001

|                         |                       |                    |                    |
|-------------------------|-----------------------|--------------------|--------------------|
| n <sup>b</sup>          | 125                   | 154                | 122                |
| Mean (95% CI)           | 28.40 (15.85–40.94)   | 7.39 (–0.66–15.45) | –1.31 (–5.15–2.53) |
| Median (IQR)            | 7.87 (–3.53 to 33.03) | –1.19 (–10.39 to   | –2.93 (–11.07 to   |
| Range                   | –40.9 to 525.2        | 7.55)              | 6.17)              |
| NNT                     | –                     | –100.0 to 299.6    | –48.7 to 117.9     |
| Absolute risk reduction | –                     | 4.76               | 3.37               |
|                         |                       | 0.21               | 0.29               |

**Number of Gd-enhancing T1 lesions****at month 24**

&lt;0.0001 &lt;0.0001

|                |                  |                  |                  |
|----------------|------------------|------------------|------------------|
| n <sup>b</sup> | 119              | 152              | 122              |
| Mean (95% CI)  | 1.29 (1.11–1.52) | 0.11 (0.07–0.18) | 0.11 (0.06–0.18) |
| Median (IQR)   | 0 (0 to 1)       | 0 (0 to 0)       | 0 (0 to 0)       |
| Range          | 0 to 17          | 0 to 5           | 0 to 6           |

|                                                                      |                         |                          |                       |        |        |
|----------------------------------------------------------------------|-------------------------|--------------------------|-----------------------|--------|--------|
| <b>Percentage change in normalized<br/>brain volume, months 0–24</b> |                         |                          |                       | 0.0048 | 0.0047 |
| n <sup>b</sup>                                                       | 119                     | 147                      | 119                   |        |        |
| Mean (95% CI)                                                        | -1.41 (-1.68--1.13)     | -0.90 (-1.15--0.66)      | -0.89 (-1.13--0.65)   |        |        |
| Median (IQR)                                                         | -1.17 (-1.87 to         | -0.70 (-1.45 to          | -0.63 (-1.68 to 0.08) |        |        |
| Range                                                                | -0.37)<br>-7.00 to 1.38 | -0.20)<br>-13.50 to 2.01 | -5.42 to 1.74         |        |        |

---

<sup>a</sup>ARRs are for confirmed relapses. ARR and *p* values were estimated from a negative binomial regression model. <sup>b</sup>n = number of patients with data.

Abbreviations: ARR = annualized relapse rate. CI = confidence interval. EDSS = Expanded Disability Status Scale. Gd = gadolinium. IQR = interquartile range. MRI = magnetic resonance imaging. NC = not calculated. NNT = numbers needed to treat. SD = standard deviation.
